# Supplementary material for: The hippocampus encodes delay and value information during delay-discounting decision making
Source: eLife. 2020 Feb 20;9:e52466. doi: 10.7554/eLife.52466 (PMC7051257; doi:10.7554/eLife.52466)
Supplement: Figure 1—source data 1. [file elife-52466-fig1-data1.xlsx]

## Sheet: Figure1
Figure 1C
Choice behavior in delay-discounitng T-maze task
		Rate of delayed choice
Animal ID	Delay length	Exp date 1	Exp date 2	Exp date 3	Mean
M9	Delay0	1	0.75	0.666667	0.805556
	Delay5	1	1	1	1
	Delay10	0.5	0.888889	1	0.796296
	Delay20	0.8	0.75	0.888889	0.812963
	Delay40	0.571429	0.5	0.75	0.607143
M10	Delay0	0.842105	0.888889	0.9	0.876998
	Delay5	0.65	0.909091	1	0.85303
	Delay10	0.769231	0.888889	0.888889	0.849003
	Delay20	0.4	0.722222	0.73913	0.620451
	Delay40	0.461538	0.538462	0.692308	0.564103
M17	Delay0	0.8	0.9	0.909091	0.869697
	Delay5	0.888889	0.888889	0.909091	0.895623
	Delay10	0.9	0.888889	0.9	0.896296
	Delay20	0.9	0.888889	0.9	0.896296
	Delay40	0.8	0.7	0.818182	0.772727
M25	Delay0	0.916667	0.888889	0.833333	0.87963
	Delay5	1	0.909091	0.875	0.92803
	Delay10	0.9	0.888889	0.833333	0.874074
	Delay20	0.916667	0.722222	0.8	0.812963
	Delay40	0.888889	0.538462	0.4	0.609117
M27	Delay0	0.777778	0.75	0.833333	0.787037
	Delay5	0.777778	0.818182	0.833333	0.809764
	Delay10	0.666667	0.833333	0.75	0.75
	Delay20	0.714286	1	0.692308	0.802198
	Delay40	0.5	0.727273	0.6	0.609091
Delay length	M9	M10	M17	M25	M27	Mean	SEM
Delay0	0.805556	0.876998	0.869697	0.87963	0.787037	0.843783	0.0175968
Delay5	1	0.85303	0.895623	0.92803	0.809764	0.89729	0.0290632
Delay10	0.796296	0.849003	0.896296	0.874074	0.75	0.833134	0.0238207
Delay20	0.812963	0.620451	0.896296	0.812963	0.802198	0.788974	0.0406172
Delay40	0.607143	0.564103	0.772727	0.609117	0.609091	0.632436	0.0322984
One-way ANOVA
						**：1% significant *：5% significant
Variance	SS	df	MS	F value	P value	Judge
Delay length	0.2036	4	0.0509	9.212	0.000217	**
Error	0.1105	20	0.0055
Total	0.3141	24
Multiple comparision with Scheffe's procedure						**：1% significant *：5% significant
		Lower limit 95% CI		Upper limit 95% CI
Delay length 1	Delay length 2		Difference		P value	Judge
Delay0	Delay5	-0.2126	-0.0534	0.1058	0.8595
	Delay10	-0.1482	0.011	0.1702	0.9996
	Delay20	-0.104	0.0552	0.2144	0.8446
	Delay40	0.0524	0.2116	0.3708	0.0055	**
Delay5	Delay10	-0.0948	0.0644	0.2236	0.7577
	Delay20	-0.0506	0.1086	0.2678	0.2918
	Delay40	0.1058	0.265	0.4242	0.0005	**
Delay10	Delay20	-0.115	0.0442	0.2034	0.9236
	Delay40	0.0414	0.2006	0.3598	0.0089	**
Delay20	Delay40	-0.0028	0.1564	0.3156	0.0558
