# Supplementary material for: The hippocampus encodes delay and value information during delay-discounting decision making
Source: eLife. 2020 Feb 20;9:e52466. doi: 10.7554/eLife.52466 (PMC7051257; doi:10.7554/eLife.52466)
Supplement: Figure 2—source data 1. [file elife-52466-fig2-data1.xlsx]

## Sheet: Figure2
Figure 2B
Detection of Ripple Events per Session
		Number of Ripples
Animal ID	Timing	Exp date 1	Exp date 2	Exp date 3	Mean
M9	Total	5	2	4	3.66667
	Start	4	1	0	1.66667
	Stem	0	0	0	0
	Delay	0	0	0	0
	Haste	0	0	0	0
	Goal	1	1	4	2
M10	Total	13	10	16	13
	Start	2	1	13	5.33333
	Stem	0	0	0	0
	Delay	0	1	0	0.333333
	Haste	0	0	0	0
	Goal	11	8	3	7.33333
M17	Total	3	13	2	6
	Start	1	5	0	2
	Stem	0	0	0	0
	Delay	0	1	0	0.333333
	Haste	0	0	0	0
	Goal	2	7	2	3.66667
M25	Total	22	16	14	17.3333
	Start	4	2	4	3.33333
	Stem	0	0	0	0
	Delay	1	0	1	0.666667
	Haste	0	0	0	0
	Goal	17	14	9	13.3333
M27	Total	7	3	28	12.6667
	Start	3	3	6	4
	Stem	0	0	0	0
	Delay	4	0	2	2
	Haste	0	0	0	0
	Goal	0	0	20	6.66667
	M9	M10	M17	M25	M27	Median
Total	3.66667	13	6	17.3333	12.6667	12.6667
Start:stem	1.66667	5.33333	2	3.33333	4	3.33333
Delay	0	0.333333	0.333333	0.666667	2	0.333333
Haste	0	0	0	0	0	0
Goal	2	7.33333	3.66667	13.3333	6.66667	6.66667
Mann-Whitney's U-test
				**：1% significant *：5% significant
Timing1	Timing2	U value	Z value	P value	Judge
Start:stem	Delay	1.5	2.193	0.0285	*
Delay	Goal	0.5	2.402	0.0164	*
