# Supplementary material for: The hippocampus encodes delay and value information during delay-discounting decision making
Source: eLife. 2020 Feb 20;9:e52466. doi: 10.7554/eLife.52466 (PMC7051257; doi:10.7554/eLife.52466)
Supplement: Figure 7—source data 1. [file elife-52466-fig7-data1.xlsx]

## Sheet: Figure7
Figure 7C							Figure 7D
Data table							One sample t-test				**：1% significant *：5% significant
Condition	Neuron type	Ratio of firing rate (log10(small reward/large reward))					Neuron-type	Mean of ratio	SEM	Sample size	T value	P value	Judge
Reward loss	Delay-act	-0.0929742					Delay-act	-0.121848	0.0465474	27	-2.571	0.0161	*
		-0.0125936					Delay-sup	0.0894784	0.0327459	39	2.693	0.0104	*
		-0.0281961
		-0.00983674
		-0.164956
		-0.12295
		0.346345
		-0.0763315
		-0.146019
		-0.184416
		0.194771
		-0.0900586
		-0.0095303
		-0.262133
		-0.471656
	Delay-sup	0.17526
		0.311225
		0.127791
		0.00452117
		0.0148326
		0.135906
		-0.364248
		0.256666
		0.169351
		-0.0190692
		-0.066325
		0.402152
		0.0611119
		0.299606
		-0.00157539
		0.158478
		-0.0244421
		0.0482871
		-0.225121
		-0.0166807
		0.27348
		0.151157
		0.563032
		0.490175
		0.0853778
		-0.0713795
		0.484791
		-0.0725526
		-0.180124
		0.109025
		-0.0868267
		-0.0248339
		-0.150915
		-0.0713795
Reward gain	Delay-act	-0.167605
		0.0242606
		-0.0103105
		-0.16339
		-0.0510573
		-0.219696
		0.12126
		0.0934469
		-0.191692
		-0.343253
		-0.211738
		-1.03958
	Delay-sup	-0.0145049
		-0.152689
		0.208322
		0.380514
		0.12126
Condition	Neuron-type	Median
Reward loss	Delay-act	-0.09
	Delay-sup	0.0545
Reward gain	Delay-act	-0.1655
	Delay-sup	0.121
Mann-Whitney's U-test
					**：1% significant *：5% significant
Condition	Neuron-type1	Neuron-type2	U value	Z value	P value	Judge
Reward loss	Delay-act	Delay-sup	131	-2.679	0.00736	**
Reward gain	Delay-act	Delay-sup	9.5	-2.108	0.0348	*
