# Supplementary material for: The hippocampus encodes delay and value information during delay-discounting decision making
Source: eLife. 2020 Feb 20;9:e52466. doi: 10.7554/eLife.52466 (PMC7051257; doi:10.7554/eLife.52466)
Supplement: Figure 8—source data 1. [file elife-52466-fig8-data1.xlsx]

## Sheet: Figure8
Figure 8A											Figure 8E
Data table		Percentage of delayed choice									Data table
Animal ID	genotypes	delay0	delay5	delay10	delay20	delay40					Genotype	Assined Group	Ratio(small reward/large reward) of firing rate (log10 transformed)
cKO1	cKO	71.4286	84.6154	100	44.4444	50					cKO	cKO	-0.37409
cKO2	cKO	100	100	100	100	80					cKO	cKO	0.0913775
cKO3	cKO	100	80	66.6667	91.6667	20					cKO	cKO	0.147676
cKO4	cKO	90.9091	100	72.7273	71.4286	62.5					cKO	cKO	0.236489
cKO5	cKO	86.6667	91.6667	100	60	44.4444					cKO	cKO	0.109144
cKO6	cKO	90	100	100	100	80					cKO	cKO	0.0255541
cKO7	cKO	100	100	100	80	83.3333					cKO	cKO	0.0674612
cKO8	cKO	100	100	85.7143	100	100					cKO	cKO	-0.143422
Con1	flox/flox	84.6154	69.2308	81.8182	60	75					flox/flox	Control	-0.0258783
Con2	flox/flox	83.3333	54.5455	66.6667	50	40					flox/flox	Control	-0.184214
Con3	flox/flox	81.25	75	63.6364	45.4545	27.2727					flox/flox	Control	0.195728
Con4	flox/flox	100	88.8889	87.5	55.5556	37.5					WT	Control	-0.0929742
Con5	flox/flox	88.2353	92.3077	88.8889	55.5556	30					WT	Control	-0.0125936
Con6	flox/flox	83.3333	61.5385	50	16.6667	23.0769					WT	Control	-0.0281961
Con7	flox/flox	100	100	77.7778	85.7143	75					WT	Control	-0.00983674
Con8	flox/flox	83.3333	66.6667	62.5	62.5	40					WT	Control	-0.164956
Con9	flox/flox	90.9091	90	90	70	30					WT	Control	-0.12295
											WT	Control	0.346345
	genotypes	delay0	delay5	delay10	delay20	delay40					WT	Control	-0.0763315
Mean	cKO	92.3755	94.5353	90.6385	80.9425	65.0347					WT	Control	-0.146019
	flox/flox	88.3344	77.5753	74.3098	55.7163	41.9833					WT	Control	-0.184416
SEM	cKO	3.56493	2.88847	4.92424	7.40014	9.15139					WT	Control	0.194771
	flox/flox	2.40908	5.25079	4.71978	6.27072	6.52902					WT	Control	-0.0900586
											WT	Control	-0.0095303
2way-ANOVA						**：1% significant *：5% significant					WT	Control	-0.262133
Factor	TypeⅢ Square Sum	DF	Mean Squeare	F value	P value	Judge					WT	Control	-0.471656
Delay length	15478.6	4	3869.65	14.3671	9.39405e-09	**					WT	Control	-0.326686
Genotype	6207.78	1	6207.78	23.048	7.87854e-06	**					WT	Control	-0.228087
Interaction	1154.54	4	288.636	1.07164	0.376606						WT	Control	-0.183063
Error	20200.6	75	269.342								WT	Control	-0.167605
Total	43489.4	84									WT	Control	0.0242606
											WT	Control	-0.0103105
Post-hoc Scheffe's test								**：1% significant *：5% significant			WT	Control	-0.16339
Delay length	Genotype1	Genotype2	Mean1	Mean2	Difference	F value	P value	Judge			WT	Control	-0.0510573
delay0	cKO	f/f	92.3755	88.3344	4.04112	0.256794	0.613818				WT	Control	-0.219696
delay5	cKO	f/f	94.5353	77.5753	16.9599	4.52302	0.036731	*			WT	Control	0.12126
delay10	cKO	f/f	90.6385	74.3098	16.3288	4.19263	0.044102	*			WT	Control	0.0934469
delay20	cKO	f/f	80.9425	55.7163	25.2262	10.0065	0.00225281	**			WT	Control	-0.191692
delay40	cKO	f/f	65.0347	41.9833	23.0514	8.35557	0.00502652	**			WT	Control	-0.343253
											WT	Control	-0.211738
											WT	Control	-1.03958
											Mann-Whitney's U-test
															**：1% significant *：5% significant
											Group1	Group2	U value	Z value	P value	Judge
											cKO	Control	71	-2.006	0.0448	*
