# Supplementary material for: The hippocampus encodes delay and value information during delay-discounting decision making
Source: eLife journal article supplement (doi:10.7554/elife.52466), 2020-02-20
Supplement: supp [file elife-52466-supp-v1.zip]

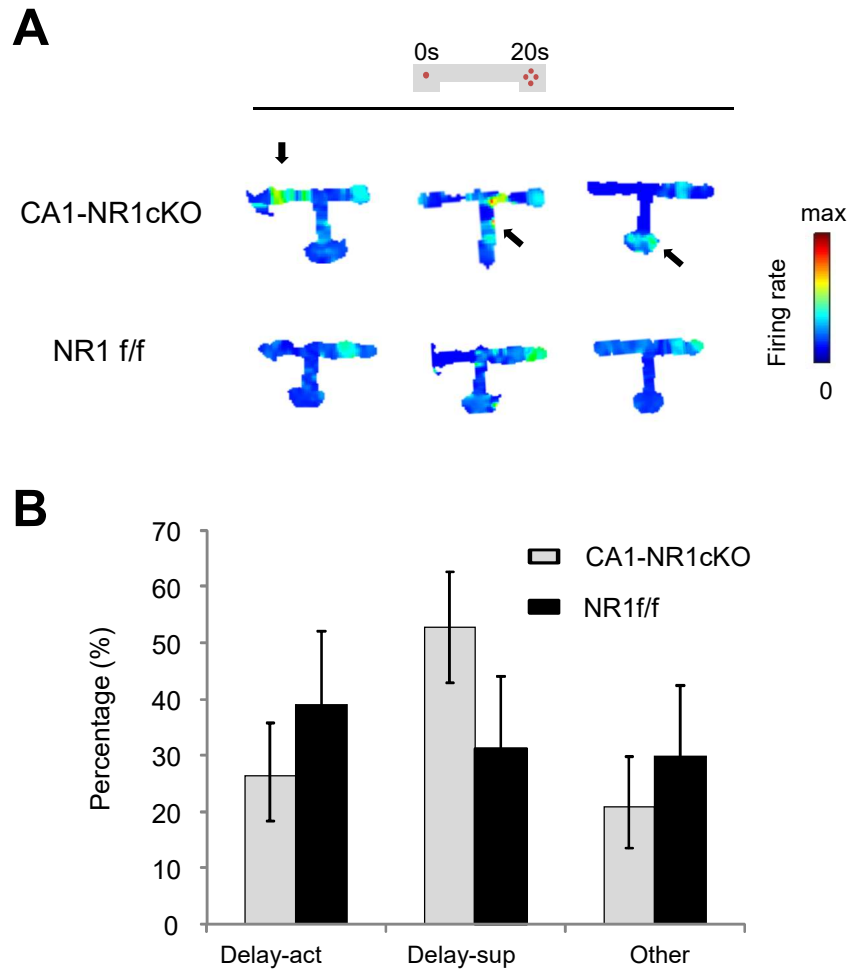

**Figure 8-figure supplement 1. Mutant mice (CA1-NR1cKO) exhibiting impaired delay discounting showed less specific spatial representation in place cell activities and less in the number of delay-active cells.**

- (A) Spatial representation of example neurons from delay-act in CA1-NR1cKO (upper) and control mice (lower). Arrows indicate areas with non-specific firing.
- (B) Percentages of delay-act and -sup cells in mutant and control mice. Error bars indicate 95% Clopper-Pearson's confidence intervals.
