# Supplementary material for: The hippocampus encodes delay and value information during delay-discounting decision making
Source: eLife journal article supplement (doi:10.7554/elife.52466), 2020-02-20
Supplement: supp [file elife-52466-supp-v1.zip]

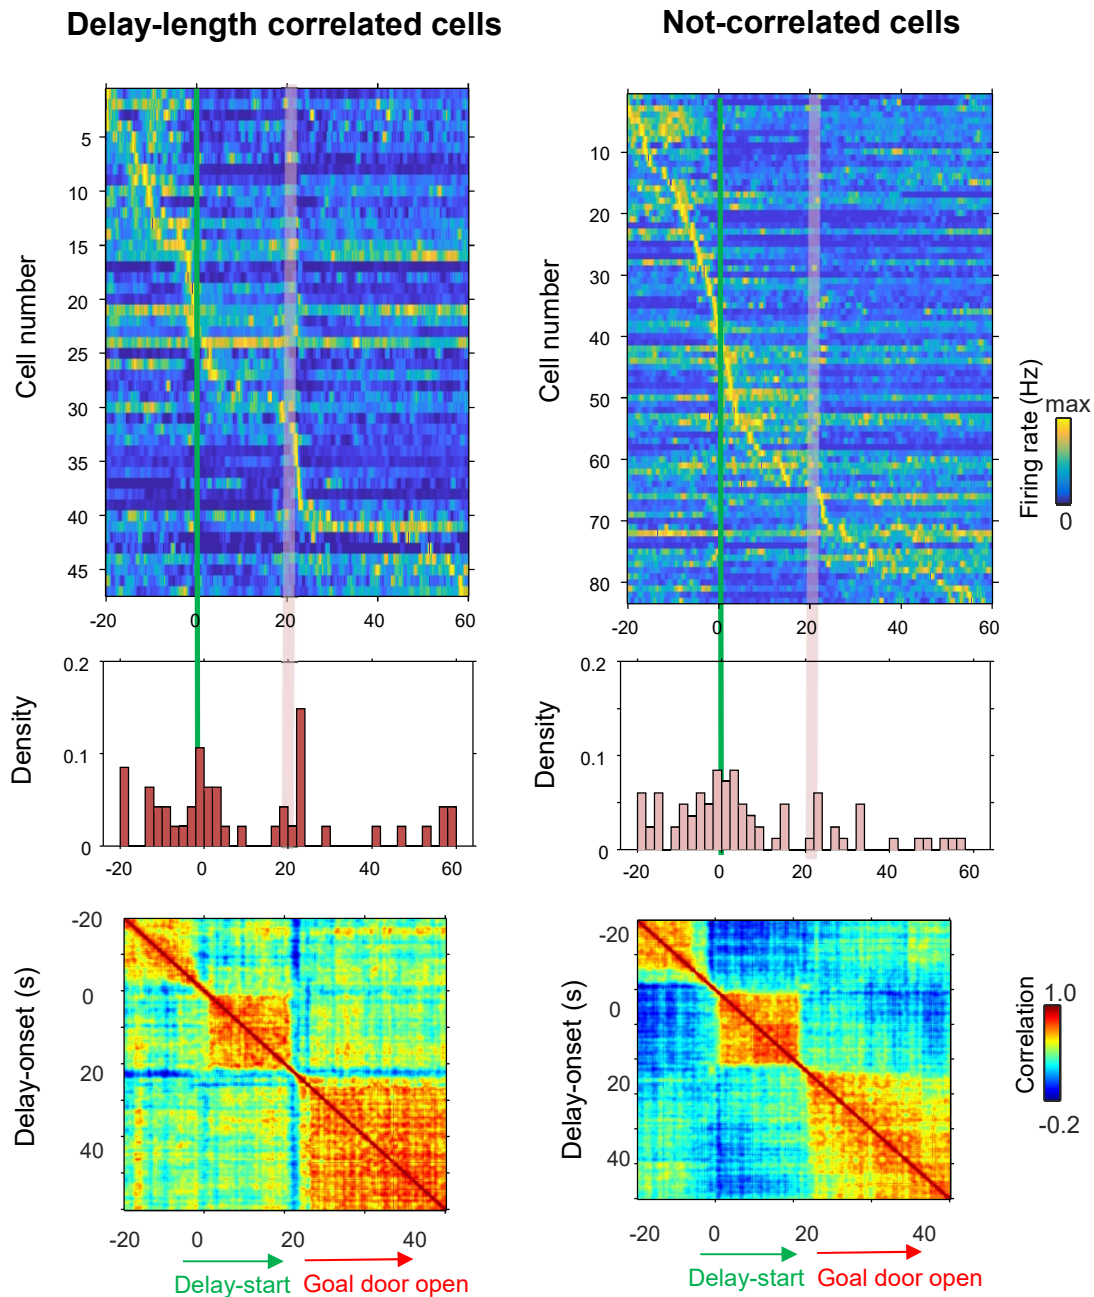

**Figure 5-figure supplement 3. Population coding of long delay in the delay-length-correlated and non-correlated CA1 cells.**

Temporal patterns of firing rates in CA1 delay-length-correlated and non-correlated cells during delay. Top, Color-coded temporal firing patterns. Neurons were ordered by the time of their peak firing rates Middle, Temporal distribution of peak firing rates of the neurons. Green lines indicate delay-onset. Pale red lines indicate expected delay-offset. Bottom, Correlation matrix of population vectors as a function of time for CA1 delay-active and delay-suppressive cells.
