# Supplementary material for: The hippocampus encodes delay and value information during delay-discounting decision making
Source: eLife journal article supplement (doi:10.7554/elife.52466), 2020-02-20
Supplement: supp [file elife-52466-supp-v1.zip]

## Extension of delay conditions

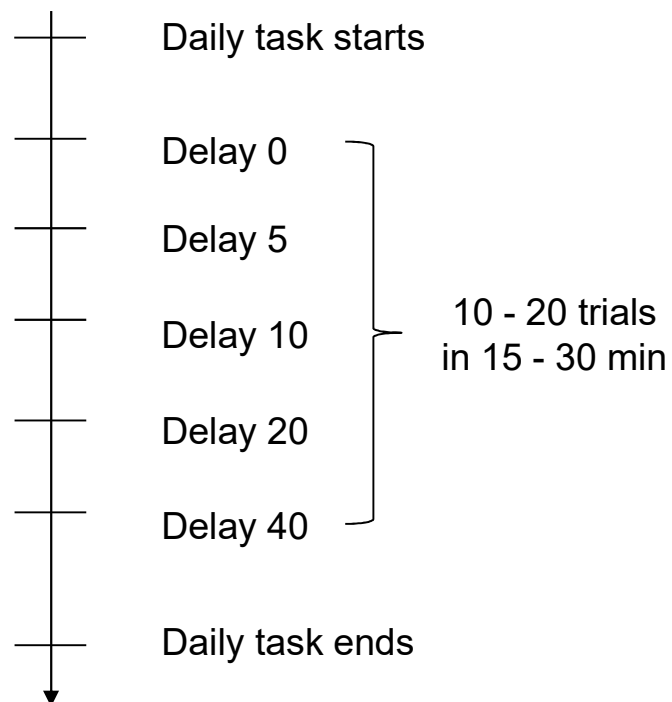

**Figure 1-figure supplement 1. Daily timeline of Extension of delay conditions.**

Arrow indicates time flow. Mice individually had 10-20 trials for each delay condition (0, 5, 10, 20 and 40 sec) on right or left arm.
