# Supplementary material for: The hippocampus encodes delay and value information during delay-discounting decision making
Source: eLife journal article supplement (doi:10.7554/elife.52466), 2020-02-20
Supplement: supp [file elife-52466-supp-v1.zip]

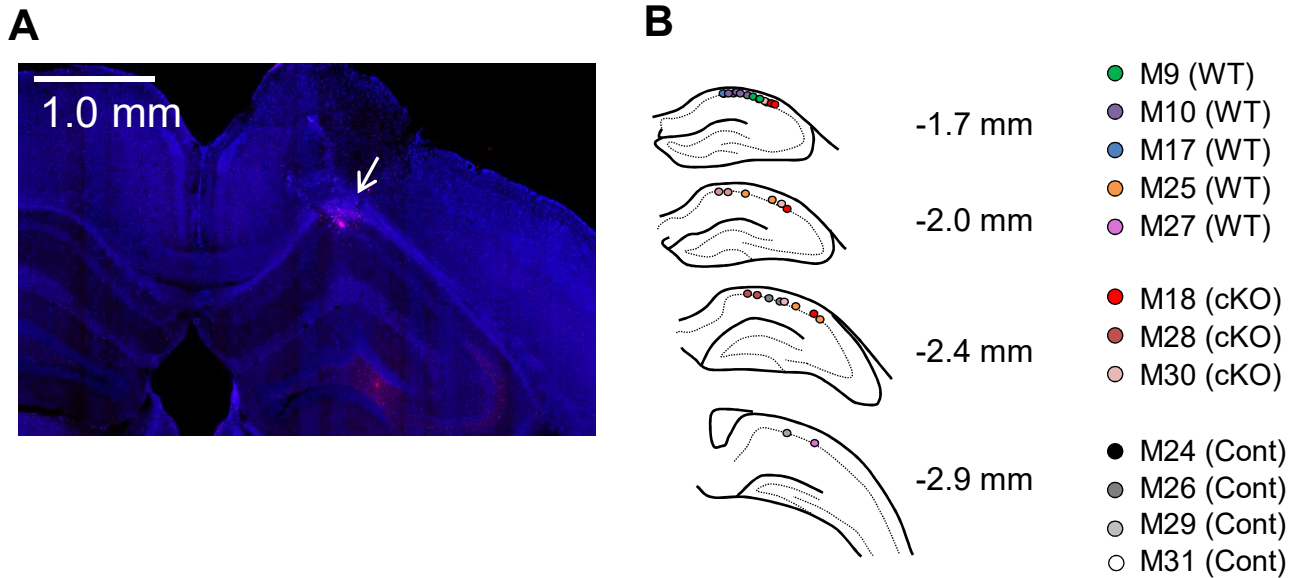

**Figure 2-figure supplement 1. Histological verification of recording sites in the CA1.**

- (A) An example of hippocampal slice with Dil pasted at tip of the electrode and DAPI staining. White arrows indicate inserted points.
- (B) Electrode tracks are represented by colored dots corresponding to the subjects. The recording electrodes for M9, M10, M18, M24, and M26 were silicon probes (A4-2tet-5mm-150-200-121-H32, NeuroNexus), and M17, M25, M28, M29, M30 and M31 were nichrome tetrodes. The all electrodes were set on the microdrives and adjusted to the targeting cites.
