# Supplementary material for: The hippocampus encodes delay and value information during delay-discounting decision making
Source: eLife journal article supplement (doi:10.7554/elife.52466), 2020-02-20
Supplement: supp [file elife-52466-supp-v1.zip]

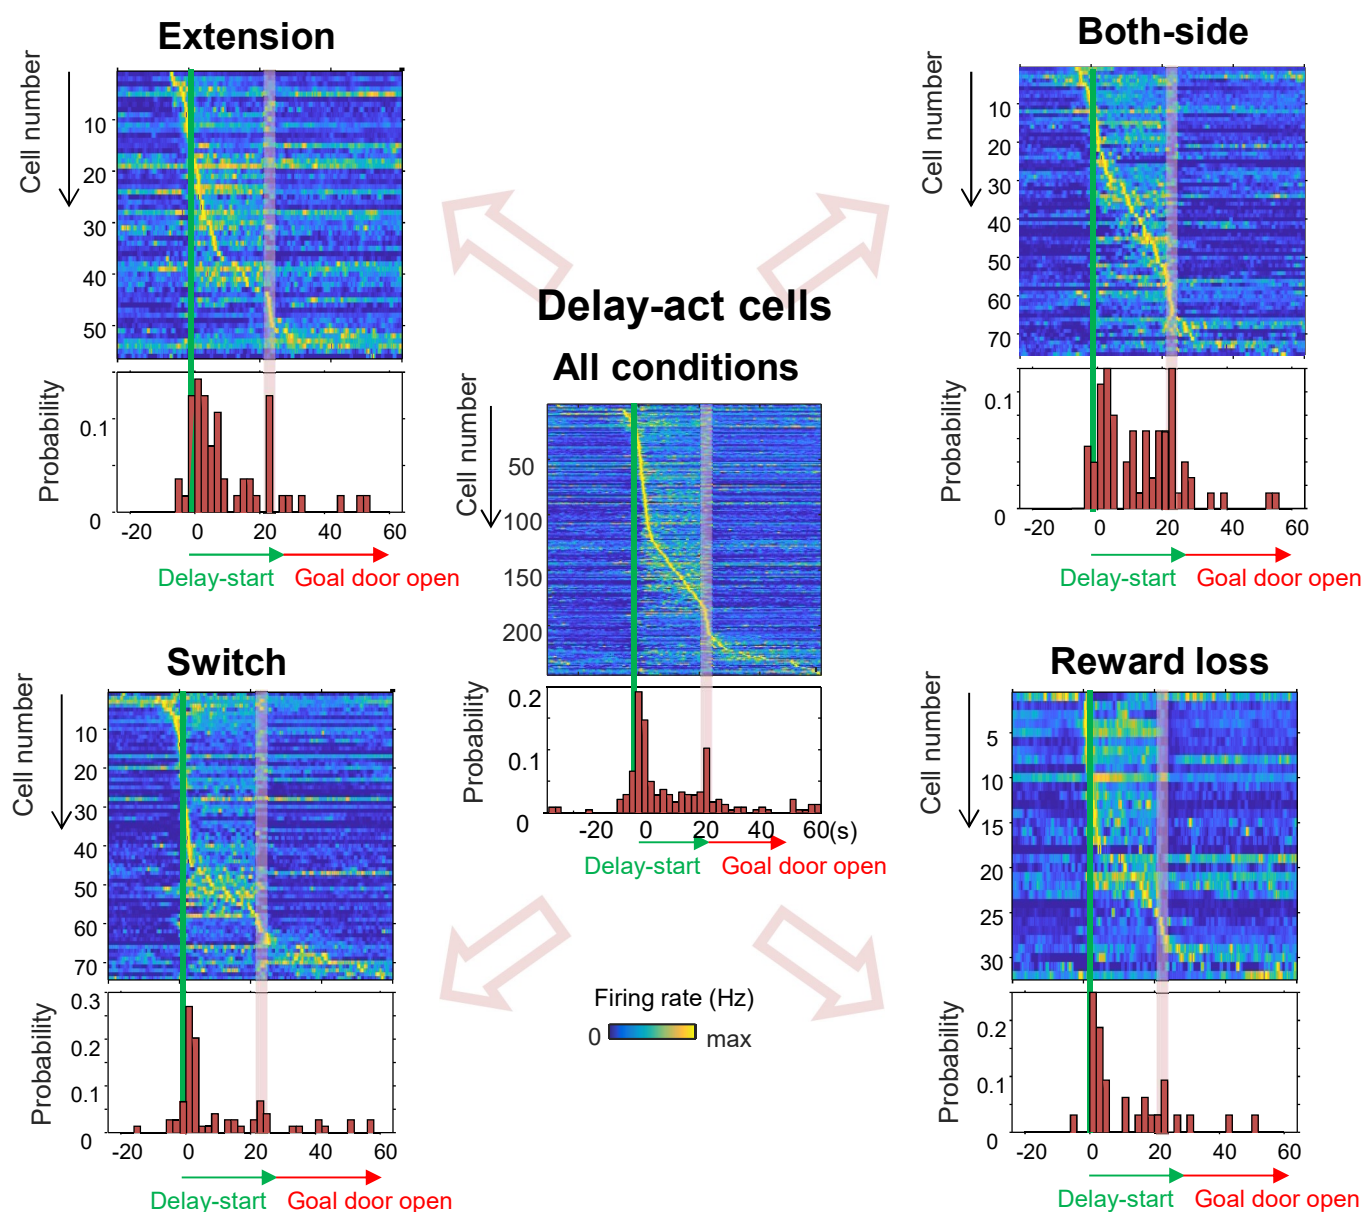

**Figure 4-figure supplement 2. Population coding of long delay in CA1 delay-active cells in different experimental conditions.**

Temporal patterns of firing rates in CA1 delay-active cells from all conditions (Center), Extension (Upper left), Switch (Lower left), Both-side (Upper right), and Reward lose (Lower right) conditions. Relatively uniform distribution of peak firing rate found in Both-side conditions (one sample kstest,  $P = 0.46$ ) compared to the other conditions ( $P < 0.001$ , for Extension;  $P < 0.001$ , for Switch; and  $P = 0.01$ , for Reward lose). Top, color-coded temporal firing patterns. Neurons were ordered by the time of their peak firing rates. Bottom, temporal distribution of peak firing rates of the neurons. Green lines indicate delay-onset. Pale red lines indicate expected delay-offset.
