# Supplementary material for: The hippocampus encodes delay and value information during delay-discounting decision making
Source: eLife journal article supplement (doi:10.7554/elife.52466), 2020-02-20
Supplement: supp [file elife-52466-supp-v1.zip]

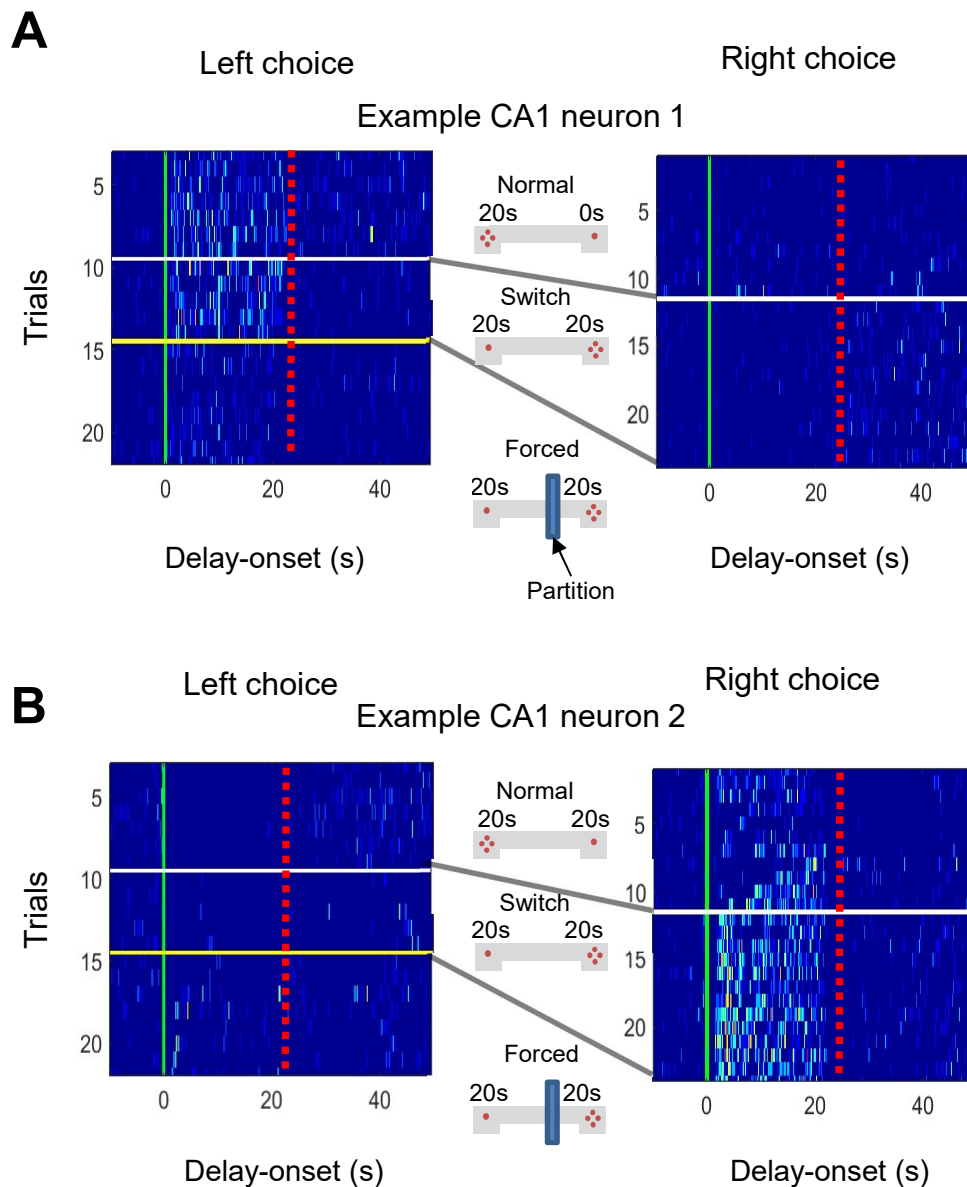

**Figure 7-figure supplement 2. Firing in CA1 delay-act cells depended on animal preference.**

Forced conditions where the animals were forced to choose one side by a partition (here, left side). Yellow line indicates the trial converted to forced conditions.

- (A) The firing in the left side disappeared when the preference to the left side was extinguished.
- (B) Simultaneously, other neuron showed increased firing when the preference recovered to the other side (here, right side).
