# Supplementary material for: The hippocampus encodes delay and value information during delay-discounting decision making
Source: eLife journal article supplement (doi:10.7554/elife.52466), 2020-02-20
Supplement: supp [file elife-52466-supp-v1.zip]

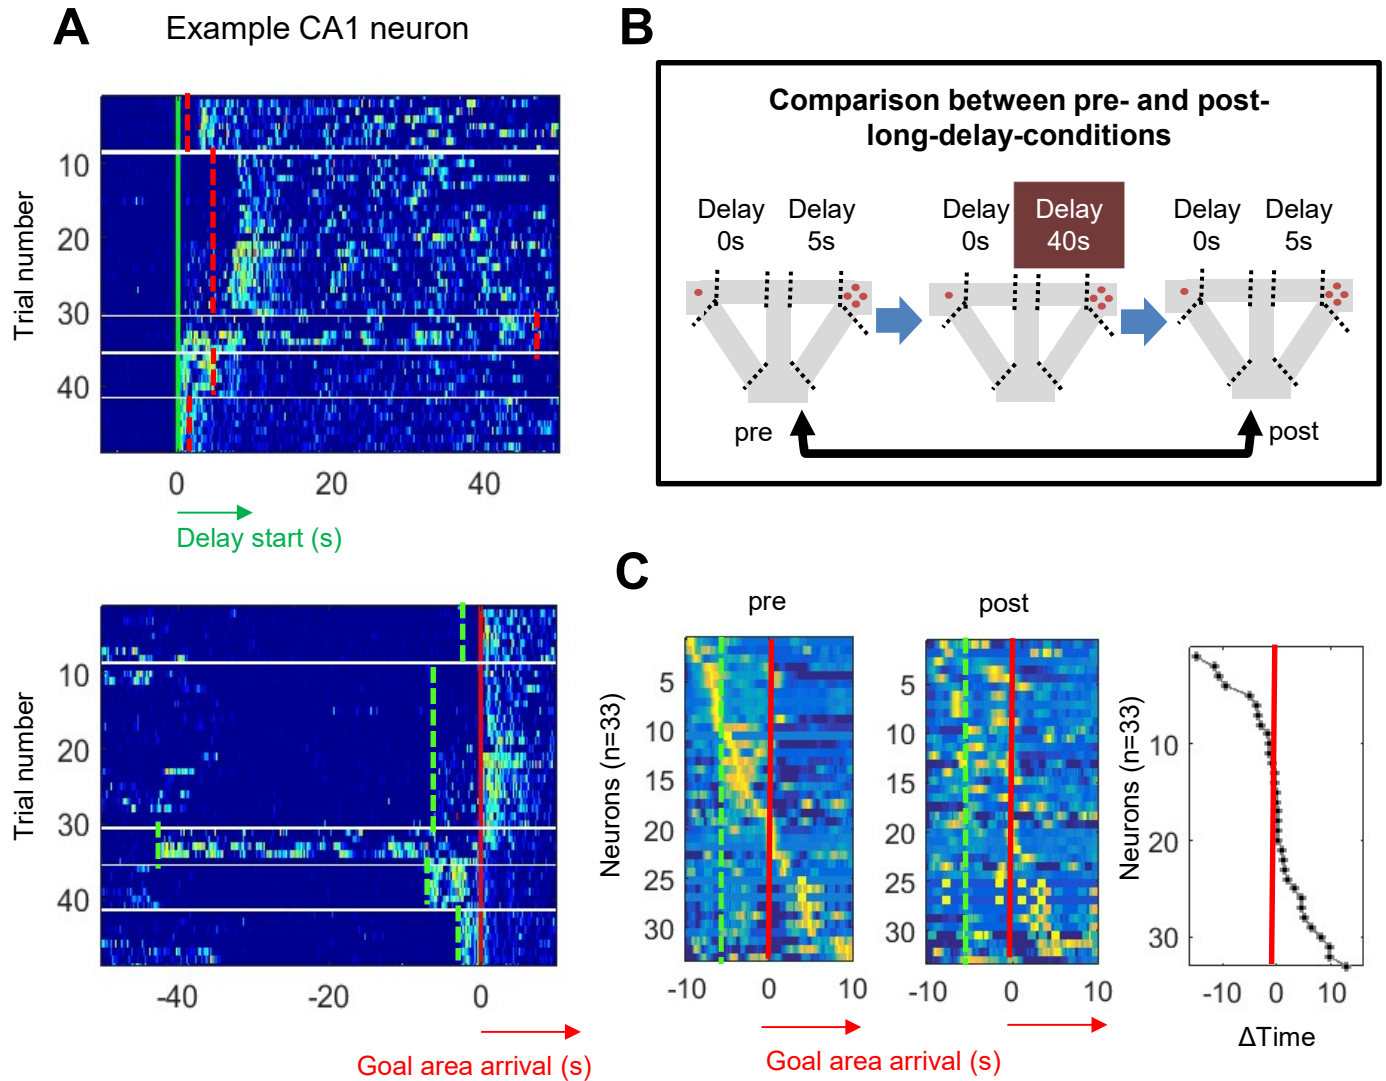

**Figure 5-figure supplement 2. Temporal patterns of the CA1 neuron shift as sessions progressed.**

- (A) Firing gradually shifted backward.
- (B) Task schedule for comparison of firing patterns between pre- and post-long delay-session(s).
- (C) Normalized firing rate sorted by peak firing rate time on pre-(Left) and post-long-delay-session (Center). The order of the cells in the pre- and post was identical. Difference in peak firing time between pre- and post-long-delay-session (sorted by time, Right).
