# Supplementary material for: The hippocampus encodes delay and value information during delay-discounting decision making
Source: eLife journal article supplement (doi:10.7554/elife.52466), 2020-02-20
Supplement: supp [file elife-52466-supp-v1.zip]

## Reward loss conditions

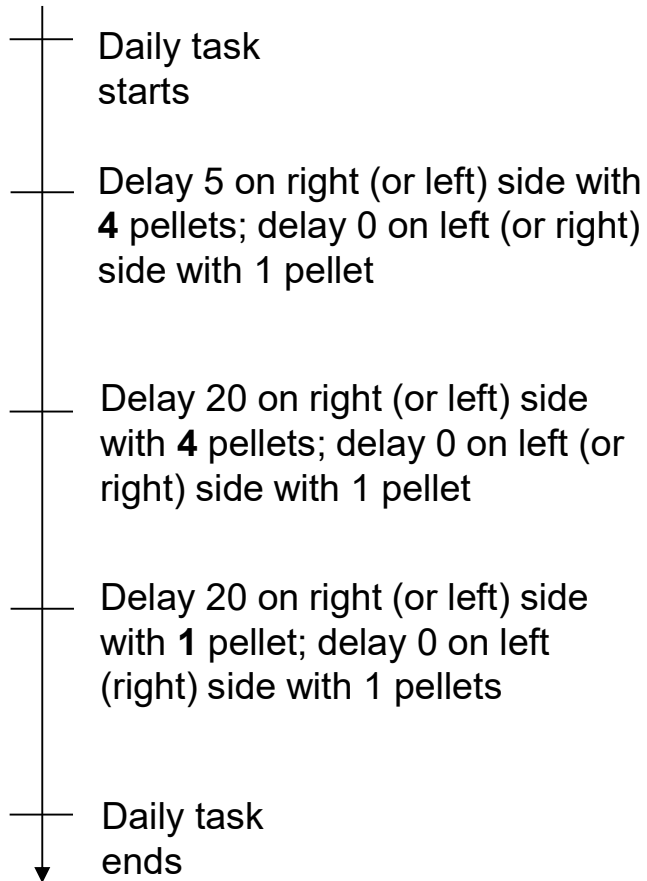

## Reward gain conditions

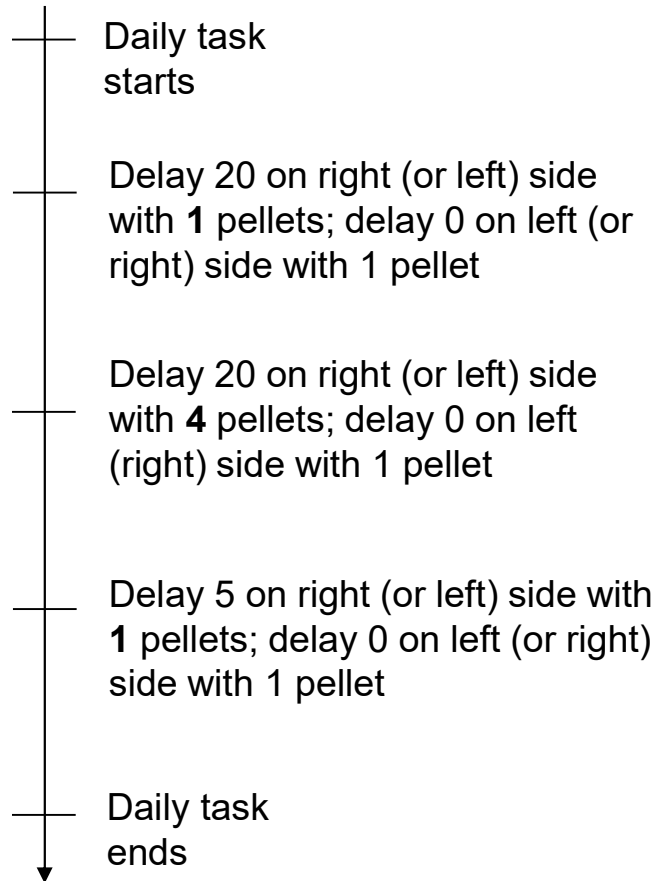

**Figure 7-figure supplement 1. Daily timeline of reward loss and gain conditions.**
