# Supplementary material for: The hippocampus encodes delay and value information during delay-discounting decision making
Source: eLife journal article supplement (doi:10.7554/elife.52466), 2020-02-20
Supplement: supp [file elife-52466-supp-v1.zip]

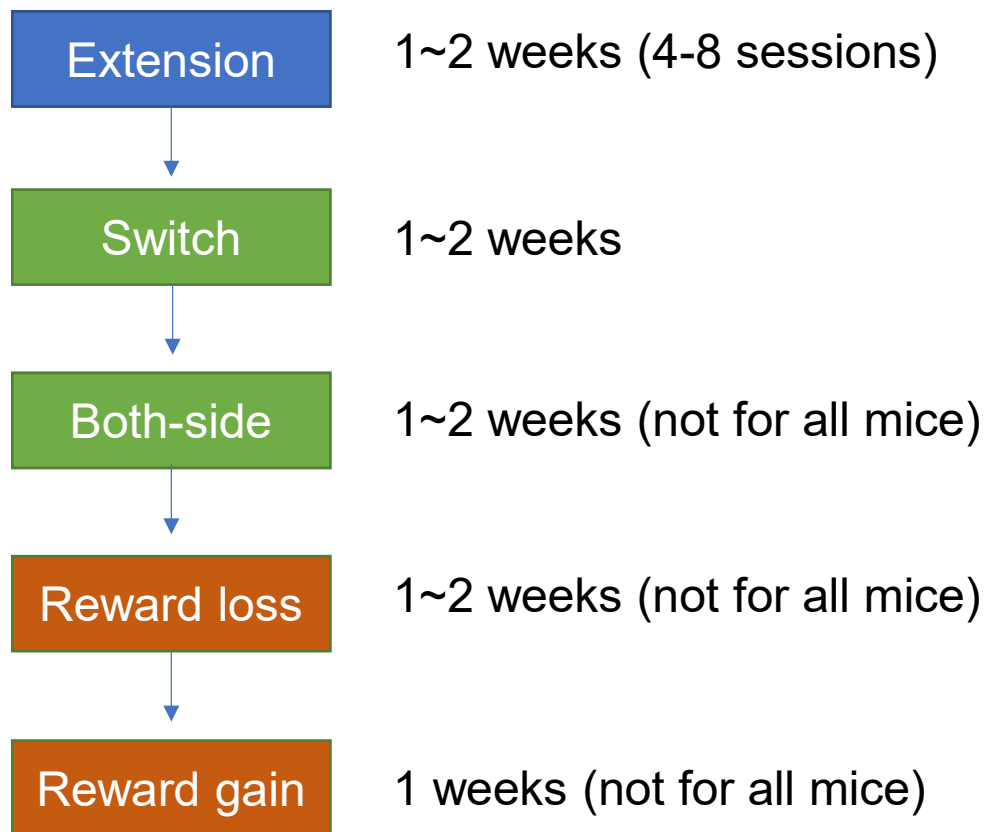

**Figure 1-figure supplement 2. Schedule of running experimental conditions.**

All the experimental conditions were performed in different weekly sessions.
