# Supplementary material for: The hippocampus encodes delay and value information during delay-discounting decision making
Source: eLife journal article supplement (doi:10.7554/elife.52466), 2020-02-20
Supplement: supp [file elife-52466-supp-v1.zip]

### Peak-Trough & Firing Rate dimension

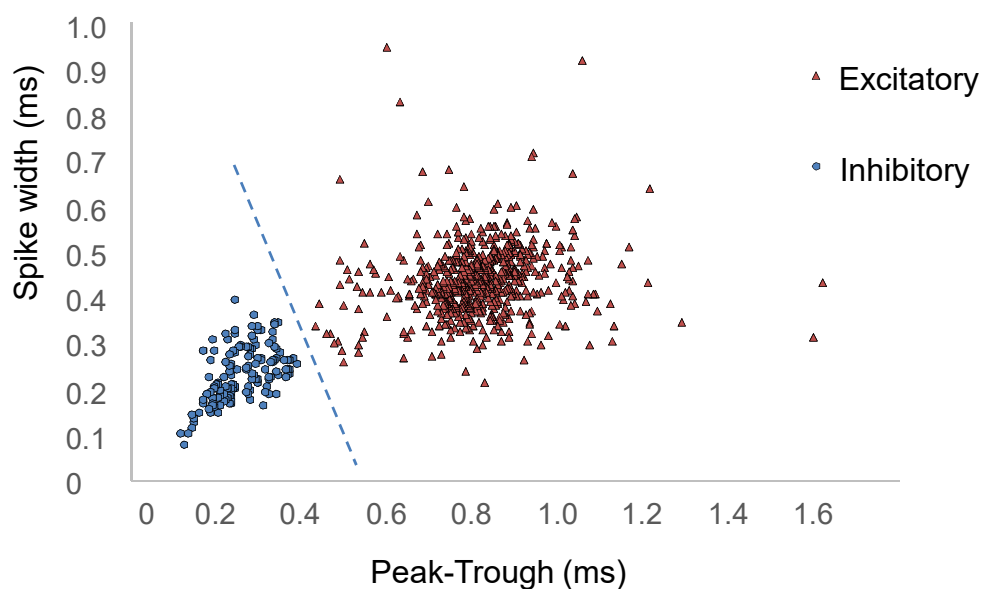

**Figure 2-figure supplement 2. Cell-type classification by plot in peak-trough and spike width 2D dimension.**

Red triangles indicate excitatory neurons, while blue circles indicate inhibitory neurons. Dotted line indicates classification criteria for excitatory and inhibitory determinations.
